# Supplementary material for: Bitemporal Versus High-Dose Unilateral Twice-Weekly Electroconvulsive Therapy for Depression (EFFECT-Dep): A Pragmatic, Randomized, Non-Inferiority Trial
Source: Atypon-hosted journal article supplement (doi:10.1176/appi.ajp.2015.15030372), 2016-02-19
Supplement: appi.ajp.2015.15030372.ds001.pdf [file appi.ajp.2015.15030372.ds001.pdf]

 


Psychiatry Online
